# Supplementary material for: Involuntary Psychiatric Admissions and Development of Psychiatric Services as an Alternative to Full-Time Hospitalization in France
Source: Atypon-hosted journal article supplement (doi:10.1176/appi.ps.201600453), 2017-05-15

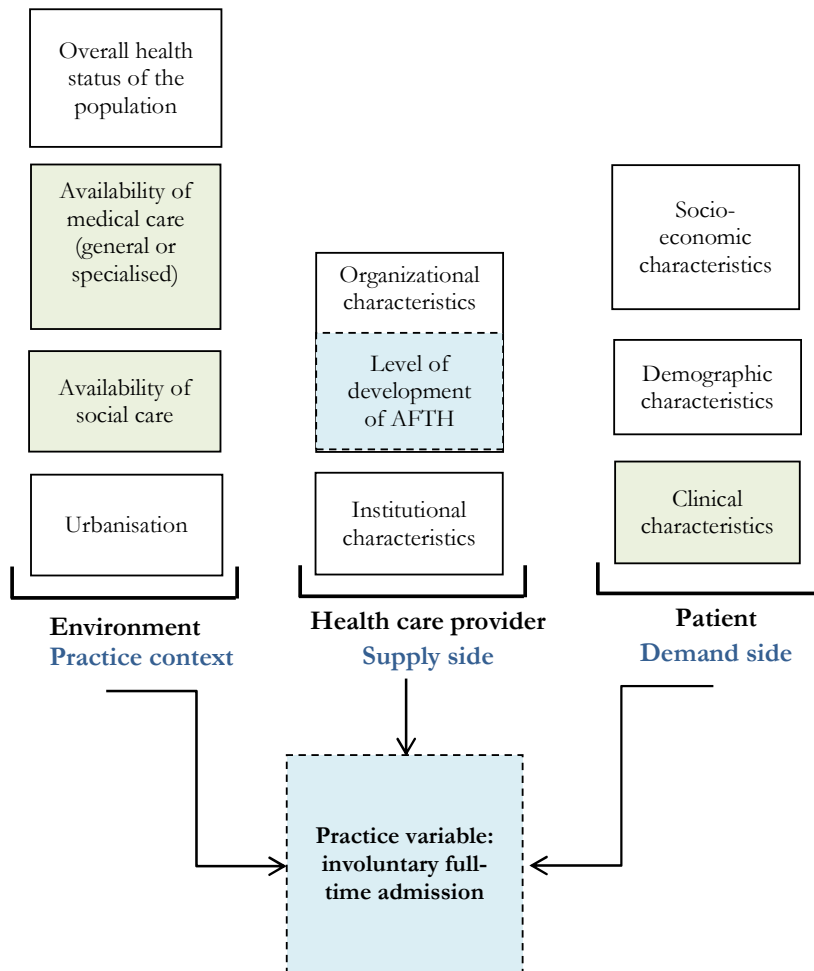

- Association of interest in the study
- Adjustment factors with similar mechanisms as the association of interest
- Additional adjustment factors identified in the literature

**Flowchart for the selection of included sectors based on data quality**

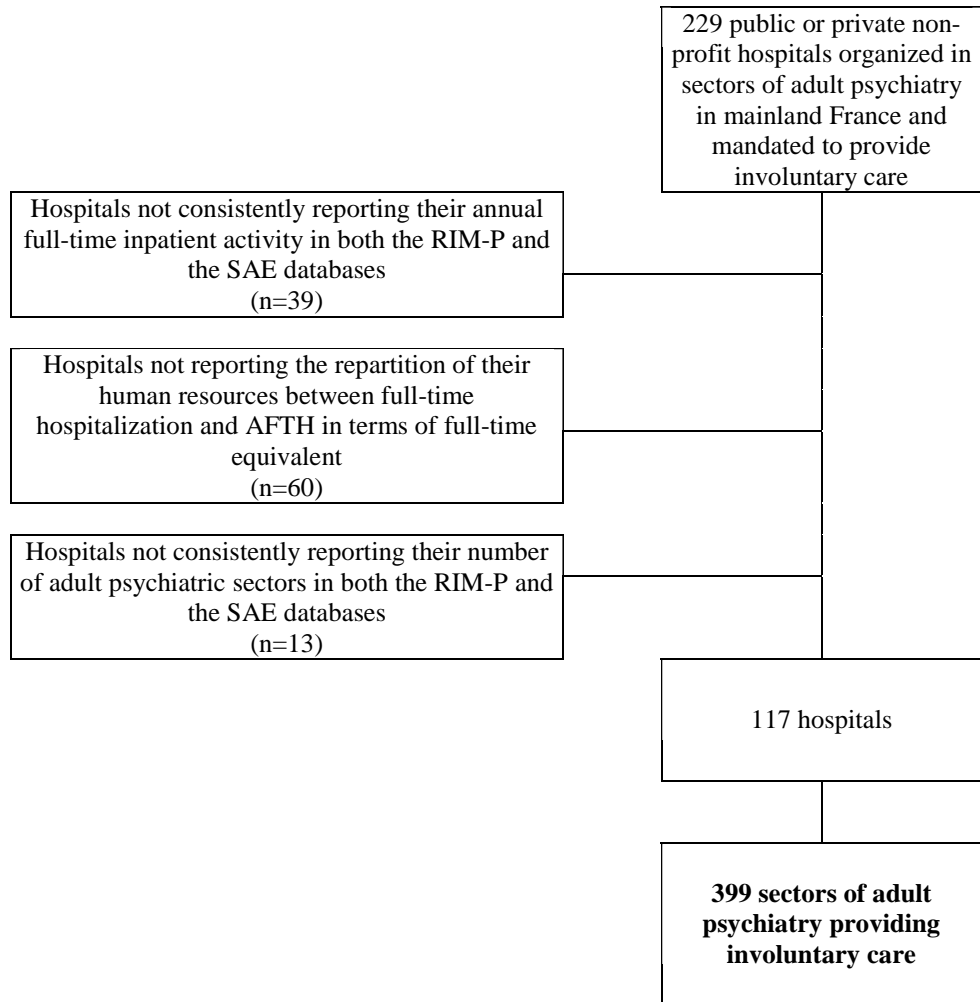

Supplement: appi.ps.201600453.ds001.pdf [file appi.ps.201600453.ds001.pdf]
